# Supplementary material for: Monte Carlo Method and GA-MLR-Based QSAR Modeling of NS5A Inhibitors against the Hepatitis C Virus
Source: MDPI journal article supplement (doi:10.3390/molecules27092729), 2022-04-23
Supplement: s1 [file s1]

# Supporting Information For

## Monte Carlo method and GA-MLR based QSAR modeling of NS5A inhibitors against the Hepatitis C Virus

Wissal Liman<sup>1</sup>; Mehdi Oubahmane<sup>2</sup>; Ismail Hdoufane<sup>2</sup>; Imane Bjjj<sup>3</sup>; Didier Villemin<sup>4</sup>; Rachid Daoud<sup>1</sup>; Driss Cherqaoui<sup>2</sup>; Achraf El Allali<sup>1,\*</sup>

<sup>1</sup> African Genome Center, Mohammed VI Polytechnic University, Ben Guerir, Morocco.

<sup>2</sup> Department of Chemistry, Faculty of Sciences Semlalia, BP, 2390 Marrakech, Morocco.

<sup>3</sup> Institut Supérieur des Professions Infirmières et Techniques de Santé (ISPITS), 73000, Dakhla, Maroc.

<sup>4</sup> Ecole Nationale Supérieure d'Ingénieurs (ENSI CAEN) Laboratoire de Chimie Moléculaire et Thioorganique. UMR 6507 CNRS, INC3M, FR3038, Labex EMC3, Labex SynOrg ENSICAEN & Université de Caen, France.

\* Corresponding author:

*E-mail adresse:* Achraf El Allali (Achraf.ELALLALI@um6p.ma)

## Table of contents

**Table S1:** SMILES notation for the 36 compounds and their experimental activity data .

**Table S2:** The mathematical equation of various statistical parameters.

**Table S3:** Chemical structures of designed NS5A inhibitors

**Table S1:** SMILES notation for the 36 compounds and their experimental activity data.

| ID | SMILES                                                                                                                                                   | EC <sub>50</sub><br>(nM) |
|----|----------------------------------------------------------------------------------------------------------------------------------------------------------|--------------------------|
| 1  | COC(=O)N[C@@H](C(=O)N1CCC[C@H]1C1=NC(=CN1)C1=CC=C(C=C1)C1=CC=C(C=C1)C1=CC=C(C=C1)C1=CC=C(C=C1)[C@H]1CCCCN1C(=O)[C@@H](NC(=O)OC)C1=CC=CC=C1)C1=CC=CC=C1   | 0,098                    |
| 2  | CCCC(=O)NC1=CC=C(C=C1)C1=CC=C(C=C1)C1=CNC(=N1)[C@@H]1CCCCN1C(=O)[C@H](NC(=O)OC)C1=CC=CC=C1                                                               | 2800                     |
| 3  | CCCC(=O)NC1=CC=C(C=C1)C1=CC=C(C=C1)C1=CNC(=N1)[C@@H]1CCCCN1C(=O)[C@H](NC(=O)C1=CC=CC=C1)C1=CC=CC=C1                                                      | 2400                     |
| 4  | CCCC(=O)NC1=CC=C(C=C1)C1=CC=C(C=C1)C1=CNC(=N1)[C@@H]1CCCCN1C(=O)[C@H](NC(=O)CCCC1=CC=CC=C1)C1=CC=CC=C1                                                   | 1300                     |
| 5  | CCCC(=O)NC1=CC=C(C=C1)C1=CC=C(C=C1)C1=CNC(=N1)[C@@H]1CCCCN1C(=O)[C@H](NC(=O)CCCCCCC1=CC=CC=C1)C1=CC=CC=C1                                                | 642                      |
| 6  | CCCC(=O)NC1=CC=C(C=C1)C1=CC=C(C=C1)C1=CNC(=N1)[C@@H]1CCCCN1C(=O)[C@H](NC(=O)CCNC(=O)OCC1=CC=CC=C1)C1=CC=CC=C1                                            | 56                       |
| 7  | CCCC(=O)NC1=CC=C(C=C1)C1=CC=C(C=C1)C1=CNC(=N1)[C@H]1CCCCN1C(=O)C(NC(=O)C1=CC=CC=C1NC(=O)OCC1=CC=CC=C1)C1=CC=CC=C1                                        | 614                      |
| 8  | CCCC(=O)NC1=CC=C(C=C1)C1=CC=C(C=C1)C1=CNC(=N1)[C@@H]1CCCCN1C(=O)[C@H](NC(=O)C1=CC(NC(=O)OCC2=CC=CC=C2)=CC=C1)C1=CC=CC=C1                                 | 44                       |
| 9  | CCCC(=O)NC1=CC=C(C=C1)C1=CC=C(C=C1)C1=CNC(=N1)[C@@H]1CCCCN1C(=O)[C@H](NC(=O)C1=CC=C(NC(=O)OCC2=CC=CC=C2)C=C1)C1=CC=CC=C1                                 | 131                      |
| 10 | CCCC(=O)NC1=CC=C(C=C1)C1=CC=C(C=C1)C1=CNC(=N1)[C@H]1CCCCN1C(=O)[C@@H](NC(=O)N1CCC[C@H](C1)NC(=O)OCC1=CC=CC=C1)C1=CC=CC=C1                                | 247                      |
| 11 | CCCC(=O)NC1=CC=C(C=C1)C1=CC=C(C=C1)C1=CNC(=N1)[C@H]1CCCCN1C(=O)[C@@H](NC(=O)N1CCC[C@H](C1)NC(=O)OCC1=CC=CC=C1)C1=CC=CC=C1                                | 100                      |
| 12 | CCCC(=O)NC1=CC=C(C=C1)C1=CC=C(C=C1)C1=CNC(=N1)[C@@H]1CCCCN1C(=O)[C@H](NC(=O)N1CC[C@H](C1)NC(=O)OCC1=CC=CC=C1)C1=CC=CC=C1                                 | 82                       |
| 13 | CCCC(=O)NC1=CC=C(C=C1)C1=CC=C(C=C1)C1=CNC(=N1)[C@@H]1CCCCN1C(=O)[C@H](NC(=O)N1CC[C@H](C1)NC(=O)OCC1=CC=CC=C1)C1=CC=CC=C1                                 | 1.1                      |
| 14 | CCCC(=O)NC1=CC=C(C=C1)C1=CC=C(C=C1)C1=CNC(=N1)[C@H]1CCCCN1C(=O)[C@@H](NC(=O)N1CCCC1)C1=CC=CC=C1                                                          | 353                      |
| 15 | CCCC(=O)NC1=CC=C(C=C1)C1=CC=C(C=C1)C1=CNC(=N1)[C@H]1CCCCN1C(=O)[C@@H](NC(=O)N1CC[C@H](C1)NC(=O)OC)C1=CC=CC=C1                                            | 353                      |
| 16 | O=C(CCCNC(=O)OCC1=CC=CC=C1)N[C@@H](C(=O)N1CCC[C@H]1C1=NC(=CN1)C1=CC=C(C=C1)C1=CC=C(C=C1)C1=CC=C(C=C1)C1=CC=C(C=C1)C1=CC=C(C=C1)C1=CC=C(C=C1))C1=CC=CC=C1 | 34                       |
| 17 | COCC1=CC=C(C=C1)C(=O)NC1=CC=C(C=C1)C1=CC=C(C=C1)C1=CNC(=N1)[C@@H]1CCCCN1C(=O)[C@H](NC(=O)CCCNC(=O)OCC1=CC=CC=C1)C1=CC=CC=C1                              | 3.5                      |
| 18 | COC1CCC(CC1)C(=O)NC1=CC=C(C=C1)C1=CC=C(C=C1)C1=CNC(=N1)[C@@H]1CCCCN1C(=O)[C@H](NC(=O)CCCNC(=O)OCC1=CC=CC=C1)C1=CC=CC=C1                                  | 8.1                      |
| 19 | COC1CCN(CC1)C(=O)NC1=CC=C(C=C1)C1=CC=C(C=C1)C1=CNC(=N1)[C@@H]1CCCCN1C(=O)[C@H](NC(=O)CCCNC(=O)OCC1=CC=CC=C1)C1=CC=CC=C1                                  | 2.3                      |
| 20 | COC1CCN(CC1)C(=O)NC1=CC=C(C=C1)C1=CC=C(C=C1)C1=CNC(=N1)[C@@H]1CCCCN1C(=O)[C@H](NC(=O)N1CC[C@H](C1)NC(=O)OCC1=CC=CC=C1)C1=CC=CC=C1                        | 0.039                    |
| 21 | COC(=O)N[C@H](C(=O)N1CCC[C@H]1C1=NC=CN1)C1=CC=CC=C1                                                                                                      | 10000                    |

|    |                                                                                                                                                        |       |
|----|--------------------------------------------------------------------------------------------------------------------------------------------------------|-------|
| 22 | <chem>COC(=O)N[C@@H](C(=O)N1CCC[C@H]1C1=NC(=CN1)C1=CC=C(C=C1)C1=CC=CC=C1)C1=CC=CC=C1</chem>                                                            | 2800  |
| 23 | <chem>COC1CCN(CC1)C(=O)N[C@H]1CC[C@@H](CC1)C1=CC=C(C=C1)C1=CNC(=N1)[C@H]1CCCN1C(=O)[C@@H](NC(=O)N1CC[C@@H](C1)NC(=O)OCC1=CC=CC=C1)C1=CC=CC=C1</chem>   | 0.15  |
| 24 | <chem>COC1CCC(CC1)C(=O)N[C@H]1CC[C@@H](CC1)C1=CC=C(C=C1)C1=CNC(=N1)[C@H]1CCCN1C(=O)[C@@H](NC(=O)N1CC[C@@H](C1)NC(=O)OCC1=CC=CC=C1)C1=CC=CC=C1</chem>   | 0.17  |
| 25 | <chem>COC1CCC(CC1)C(=O)N[C@H]1CC[C@@H](CC1)C1=CC=C(C=C1)C1=CNC(=N1)[C@H]1CCCN1C(=O)[C@@H](NC(=O)N1CC[C@@H](C1)NC(=O)OCC1CCCCC1)C1=CC=CC=C1</chem>      | 0.039 |
| 26 | <chem>O=C(N[C@H]1CCN(C1)C(=O)N[C@H](C(=O)N1CCC[C@@H]1C1=NC(=CN1)C1=CC=C(C=C1)[C@H]1CC[C@@H](CC1)NC(=O)C1=CN=CC=N1)C1=CC=CC=C1)OCC1CCCCC1</chem>        | 0.35  |
| 27 | <chem>CCCCCOC(=O)N[C@H]1CCN(C1)C(=O)N[C@H](C(=O)N1CCC[C@@H]1C1=NC(=CN1)C1=C=C(C=C1)[C@H]1CC[C@@H](CC1)NC(=O)C1=CN=CC=N1)C1=CC=CC=C1</chem>             | 0.97  |
| 28 | <chem>CC#CCCOC(=O)N[C@H]1CCN(C1)C(=O)N[C@H](C(=O)N1CCC[C@@H]1C1=NC(=CN1)C1=CC=C(C=C1)[C@H]1CC[C@@H](CC1)NC(=O)C1=CN=CC=N1)C1=CC=CC=C1</chem>           | 3.4   |
| 29 | <chem>CCC#CCOC(=O)N[C@H]1CCN(C1)C(=O)N[C@H](C(=O)N1CCC[C@@H]1C1=NC(=CN1)C1=CC=C(C=C1)[C@H]1CC[C@@H](CC1)NC(=O)C1=CN=CC=N1)C1=CC=CC=C1</chem>           | 0.39  |
| 30 | <chem>CC#CCOC(=O)N[C@H]1CCN(C1)C(=O)N[C@H](C(=O)N1CCC[C@@H]1C1=NC(=CN1)C1=C=C(C=C1)[C@H]1CC[C@@H](CC1)NC(=O)C1=CN=CC=N1)C1=CC=CC=C1</chem>             | 2.1   |
| 31 | <chem>CCCC#CCOC(=O)N[C@H]1CCN(C1)C(=O)N[C@H](C(=O)N1CCC[C@@H]1C1=NC(=CN1)C1=CC=C(C=C1)[C@H]1CC[C@@H](CC1)NC(=O)C1=CN=CC=N1)C1=CC=CC=C1</chem>          | 0.27  |
| 32 | <chem>CC(C)C#CCOC(=O)N[C@H]1CCN(C1)C(=O)N[C@H](C(=O)N1CCC[C@@H]1C1=NC(=CN1)C1=CC=C(C=C1)[C@H]1CC[C@@H](CC1)NC(=O)C1=CN=CC=N1)C1=CC=CC=C1</chem>        | 0.18  |
| 33 | <chem>CC(C)(C)C#CCOC(=O)N[C@H]1CCN(C1)C(=O)N[C@H](C(=O)N1CCC[C@@H]1C1=NC(=CN1)C1=CC=C(C=C1)[C@H]1CC[C@@H](CC1)NC(=O)C1=CN=CC=N1)C1=CC=CC=C1</chem>     | 0.13  |
| 34 | <chem>CC(C)C#CCOC(=O)N[C@H]1CCN(C1)C(=O)N[C@H](C(=O)N1CCC[C@@H]1C1=NC(=CN1)C1=CC=C(C=C1)[C@H]1CC[C@@H](CC1)NC(=O)C1=CN=C(CO)C=N1)C1=CC=CC=C1</chem>    | 0.12  |
| 35 | <chem>CC(C)(C)C#CCOC(=O)N[C@H]1CCN(C1)C(=O)N[C@H](C(=O)N1CCC[C@@H]1C1=NC(=CN1)C1=CC=C(C=C1)[C@H]1CC[C@@H](CC1)NC(=O)C1=CN=C(CO)C=N1)C1=CC=CC=C1</chem> | 0.059 |
| 36 | <chem>COC(=O)N[C@@H](C(C)C)C(=O)N1CCC[C@@H]1C1=NC(=CN1)C1=CC=C(C=C1)C1=CC=C(C=C1)C1=CNC(=N1)[C@@H]1CCCN1C(=O)[C@H](NC(=O)OC)C(C)C</chem>               | 0.05  |

**Table S2:** Mathematical equations of statistical parameters used.

| No | Equation                                                                                                                                                                                                                                  |
|----|-------------------------------------------------------------------------------------------------------------------------------------------------------------------------------------------------------------------------------------------|
| 1  | $R_{tr}^2 = 1 - \frac{\sum (Y_{obs} - Y_{pred})^2}{\sum (Y_{obs} - \bar{Y})^2}$                                                                                                                                                           |
| 2  | $Q_{loo}^2 = 1 - \frac{\sum (Y_{obs} - Y_{pred})^2}{\sum (Y_{obs} - \bar{Y})^2}$                                                                                                                                                          |
| 3  | $R_{ext}^2 = \left[ \frac{\sum_{i=1}^{n_{ext}} (Y_{obs} - \bar{Y}_{obs}) (Y_{pred} - \bar{Y}_{pred})}{\sqrt{\sum_{i=1}^{n_{ext}} (Y_{obs} - \bar{Y}_{obs})^2 (Y_{pred} - \bar{Y}_{pred})^2}} \right]^2$                                   |
| 4  | $Q_{F1}^2 = 1 - \frac{\sum_{i=1}^{n_{ext}} (Y_{obs} - Y_{pred})^2}{\sum_{i=1}^{n_{ext}} (Y_{obs} - Y_{train})^2}$                                                                                                                         |
| 5  | $Q_{F2}^2 = 1 - \frac{\sum_{i=1}^{n_{ext}} (Y_{obs} - Y_{pred})^2}{\sum_{i=1}^{n_{ext}} (Y_{obs} - Y_{ext})^2}$                                                                                                                           |
| 6  | $Q_{F3}^2 = 1 - \frac{\sum_{i=1}^{n_{ext}} \frac{(y_i - \hat{y}_i)^2}{n_{test}}}{\sum_{j=1}^{n_{ext}} \frac{(y_j - \hat{y}_{TR})^2}{n_{TR}}} = 1 - \frac{RMSEP^2}{S_{TR}^2}$                                                              |
| 7  | $IIC = R_{set} \times \frac{\min(-MAE_{set}, +MAE_{set})}{\max(-MAE_{set}, +MAE_{set})}$                                                                                                                                                  |
| 8  | $R_m^2 = r^2 (1 - \sqrt{ r^2 - r_0^2 })$                                                                                                                                                                                                  |
| 9  | $CCI_{cal} = \sum \Delta R_{j\ calc}; \Delta R_{j\ calc} < 0$                                                                                                                                                                             |
| 10 | $CCC = \frac{2 \sum_{i=1}^{n_{ext}} (Y_{obs} - \bar{Y}_{obs}) (Y_{pred} - \bar{Y}_{pred})}{\sum_{i=1}^{n_{ext}} (Y_{obs} - \bar{Y}_{obs})^2 + \sum_{i=1}^{n_{ext}} (Y_{pred} - \bar{Y}_{pred})^2 + n_{ext} (Y_{obs} - \bar{Y}_{pred})^2}$ |
| 11 | $C_{R_p^2} = R \sqrt{(R^2 - R_r^2)}$                                                                                                                                                                                                      |
| 12 | $MAE = \frac{1}{n} \times \sum  Y_{obs} - Y_{pred} $                                                                                                                                                                                      |
| 13 | $RMSE = \sqrt{\frac{1}{n} \times \sum (Y_{obs} - Y_{pred})^2}$                                                                                                                                                                            |

**Table S3:** Chemical structures of designed NS5A inhibitors

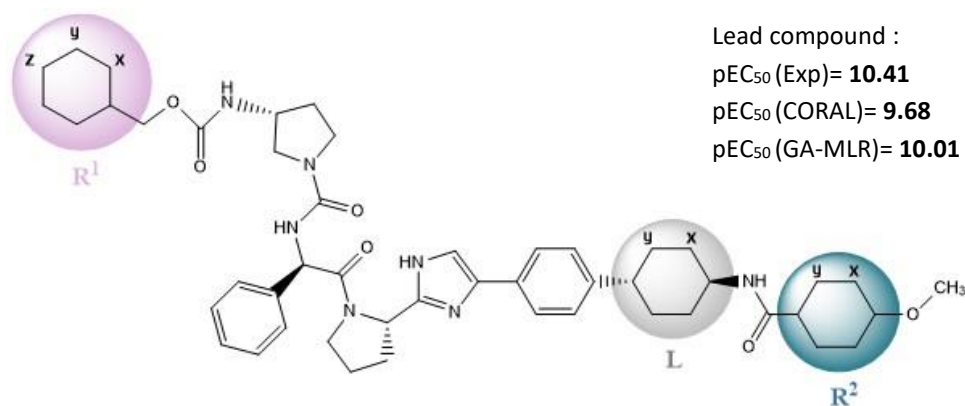

| No. |                | Promoter of increase |              | Feature                          | pEC <sub>50</sub><br>(CORAL) | pEC <sub>50</sub><br>(GA-MLR) |
|-----|----------------|----------------------|--------------|----------------------------------|------------------------------|-------------------------------|
| 1   | R <sup>1</sup> | x                    | C...(.....   | —CH <sub>3</sub>                 | 9.77                         | 10.17                         |
| 2   |                |                      | C...C.....   | —C <sub>2</sub> H <sub>5</sub>   | 9.75                         | 10.16                         |
| 3   |                |                      | C...O...C... | —OCH <sub>3</sub>                | 9.92                         | 11.09                         |
| 4   |                |                      | O...C...C... | —OC <sub>2</sub> H <sub>5</sub>  | 10.24                        | 10.64                         |
| 5   |                |                      | N...C.....   | —NHCH <sub>3</sub>               | 9.23                         | 10.63                         |
| 6   |                |                      | N...C...C... | —NHC <sub>2</sub> H <sub>5</sub> | 10.03                        | 11.11                         |
| 7   |                | y                    | C...(.....   | —CH <sub>3</sub>                 | 9.88                         | 10.50                         |
| 8   |                |                      | C...C.....   | —C <sub>2</sub> H <sub>5</sub>   | 11.78                        | 10.13                         |
| 9   |                |                      | C...O...C... | —OCH <sub>3</sub>                | 9.95                         | 11.20                         |
| 10  |                |                      | O...C...C... | —OC <sub>2</sub> H <sub>5</sub>  | 12.27                        | 11.23                         |
| 11  |                |                      | N...C.....   | —NHCH <sub>3</sub>               | 11.95                        | 10.71                         |
| 12  |                |                      | N...C...C... | —NHC <sub>2</sub> H <sub>5</sub> | 12.05                        | 10.70                         |
| 13  |                | z                    | C...(.....   | —CH <sub>3</sub>                 | 9.84                         | 10.17                         |
| 14  |                |                      | C...C.....   | —C <sub>2</sub> H <sub>5</sub>   | 11.73                        | 10.16                         |
| 15  |                |                      | C...O...C... | —OCH <sub>3</sub>                | 12.18                        | 11.18                         |
| 16  |                |                      | O...C...C... | —OC <sub>2</sub> H <sub>5</sub>  | 12.23                        | 10.68                         |
| 17  |                |                      | N...C.....   | —NHCH <sub>3</sub>               | 11.91                        | 10.67                         |
| 18  |                |                      | N...C...C... | —NHC <sub>2</sub> H <sub>5</sub> | 12.01                        | 11.16                         |

| No. |                |   |  | Promoter of increase | Feature                          | pEC <sub>50</sub><br>(CORAL) | pEC <sub>50</sub><br>(GA-MLR) |
|-----|----------------|---|--|----------------------|----------------------------------|------------------------------|-------------------------------|
| 19  | L              | x |  | C...(.....           | —CH <sub>3</sub>                 | 9.95                         | 10.14                         |
| 20  |                |   |  | C...C.....           | —C <sub>2</sub> H <sub>5</sub>   | 9.82                         | 10.11                         |
| 21  |                |   |  | C...O...C...         | —OCH <sub>3</sub>                | 9.29                         | 10.75                         |
| 22  |                |   |  | O...C...C...         | —OC <sub>2</sub> H <sub>5</sub>  | 9.18                         | 10.82                         |
| 23  |                |   |  | N...C.....           | —NHCH <sub>3</sub>               | 10.03                        | 10.53                         |
| 24  |                |   |  | N...C...C...         | —NHC <sub>2</sub> H <sub>5</sub> | 9.35                         | 10.52                         |
| 25  |                | y |  | C...(.....           | —CH <sub>3</sub>                 | 9.45                         | 10.14                         |
| 26  |                |   |  | C...C.....           | —C <sub>2</sub> H <sub>5</sub>   | 9.67                         | 10.11                         |
| 27  |                |   |  | C...O...C...         | —OCH <sub>3</sub>                | 9.98                         | 10.70                         |
| 28  |                |   |  | O...C...C...         | —OC <sub>2</sub> H <sub>5</sub>  | 9.47                         | 10.67                         |
| 29  |                |   |  | N...C.....           | —NHCH <sub>3</sub>               | 9.56                         | 10.49                         |
| 30  |                |   |  | N...C...C...         | —NHC <sub>2</sub> H <sub>5</sub> | 9.78                         | 10.47                         |
| 31  | R <sup>2</sup> | x |  | C...(.....           | —CH <sub>3</sub>                 | 9.95                         | 10.17                         |
| 32  |                |   |  | C...C.....           | —C <sub>2</sub> H <sub>5</sub>   | 9.47                         | 10.03                         |
| 33  |                |   |  | C...O...C...         | —OCH <sub>3</sub>                | 10.03                        | 11.31                         |
| 34  |                |   |  | O...C...C...         | —OC <sub>2</sub> H <sub>5</sub>  | 9.65                         | 11.30                         |
| 35  |                |   |  | N...C.....           | —NHCH <sub>3</sub>               | 9.74                         | 10.72                         |
| 36  |                |   |  | N...C...C...         | —NHC <sub>2</sub> H <sub>5</sub> | 9.96                         | 10.71                         |
| 37  |                | y |  | C...(.....           | —CH <sub>3</sub>                 | 9.82                         | 10.17                         |
| 38  |                |   |  | C...C.....           | —C <sub>2</sub> H <sub>5</sub>   | 9.54                         | 10.03                         |
| 39  |                |   |  | C...O...C...         | —OCH <sub>3</sub>                | 9.98                         | 11.19                         |
| 40  |                |   |  | O...C...C...         | —OC <sub>2</sub> H <sub>5</sub>  | 9.72                         | 11.17                         |
| 41  |                |   |  | N...C.....           | —NHCH <sub>3</sub>               | 9.81                         | 10.66                         |
| 42  |                |   |  | N...C...C...         | —NHC <sub>2</sub> H <sub>5</sub> | 10.05                        | 10.65                         |
